# Supplementary material for: CN foam loaded with few-layer graphene nanosheets for high-performance supercapacitor electrodes
Source: Royal Society of Chemistry journal article supplement (doi:10.1039/c5ta00837a), 2015-01-01
Supplement: c5ta00837a1.pdf [file c5ta00837a1.pdf]

## Supplementary Information for

# CN Foam Loaded with Few-layer Graphene Nanosheets for High-performance Supercapacitor Electrode

Guoxing Zhu,<sup>a,c,\*</sup> Chunyan Xi,<sup>a</sup> Yuanjun Liu,<sup>b</sup> Jun Zhu,<sup>a</sup> and Xiaoping Shen<sup>a,\*</sup>

<sup>a</sup>*School of Chemistry and Chemical Engineering, Jiangsu University, Zhenjiang 212013, P. R.*

*China, Fax: (+86)511-88791800; Tel: (+86)511-88791800; E-mail: [zhuguoxing@ujs.edu.cn](mailto:zhuguoxing@ujs.edu.cn);*

*[xiaopingshen@163.com](mailto:xiaopingshen@163.com).*

<sup>b</sup>*School of Environmental and Chemical Engineering, Jiangsu University of Science and*

*Technology, Zhenjiang 212013, P. R. China.*

<sup>c</sup>*State Key Laboratory of Coordination Chemistry, Nanjing National Laboratory of*

*Microstructures, Nanjing University, Nanjing, 210093, P. R. China.*

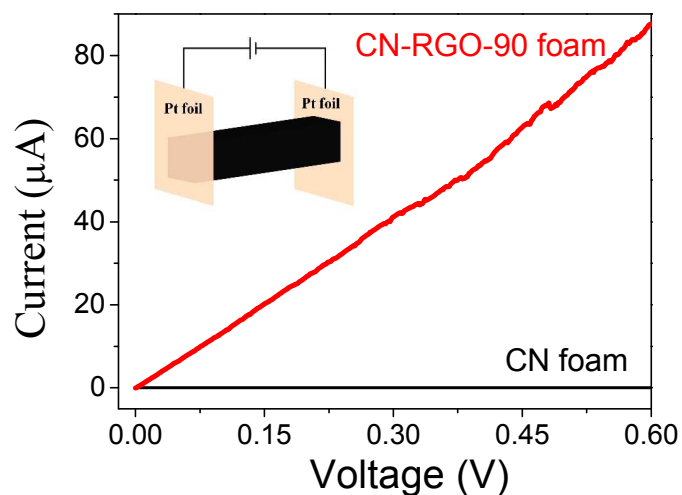

**Fig. SI-1** Current-voltage curves measured on pristine CN and CN-RGO-90 foams with the same size. The inset shows the measure illustration. It can be seen that with the same voltage, CN-RGO-90 foam show much higher current, suggesting its high conductivity.

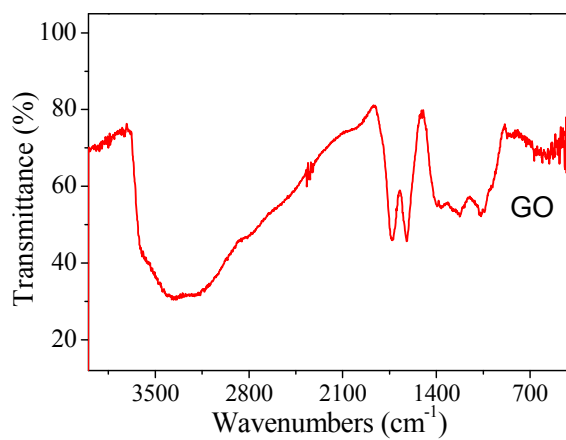

**Fig. SI-2** FT-IR spectrum for graphite oxide (GO).

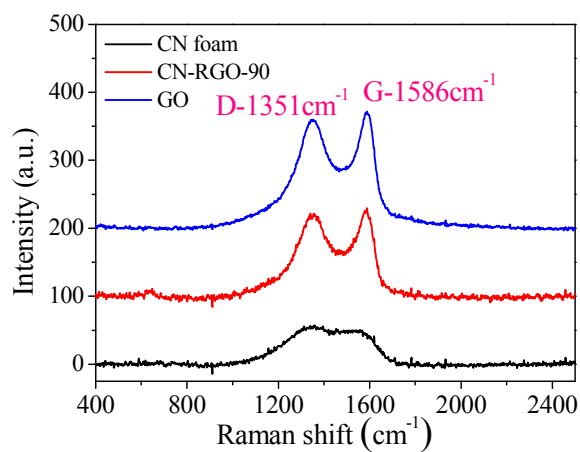

Fig. SI-3 Raman spectra of pristine CN foam (300 °C), CN-RGO-90 and GO.

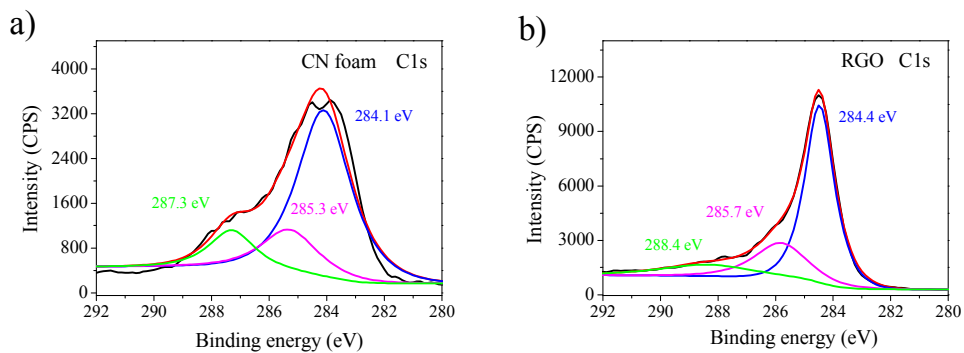

Fig. SI-4 Detailed XPS spectra for C 1s: a) pristine CN foam (300 °C) and b) pure RGO (300 °C).

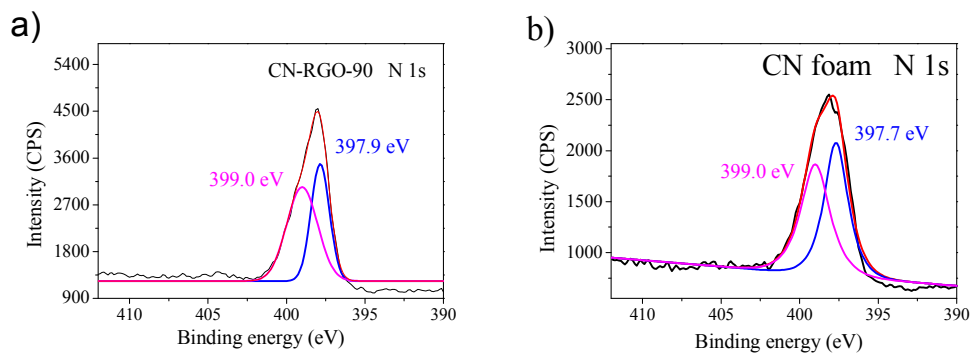

**Fig. SI-5** Detailed XPS spectra for N 1s: a) CN-RGO-90 and b) pristine CN foam (300 °C).

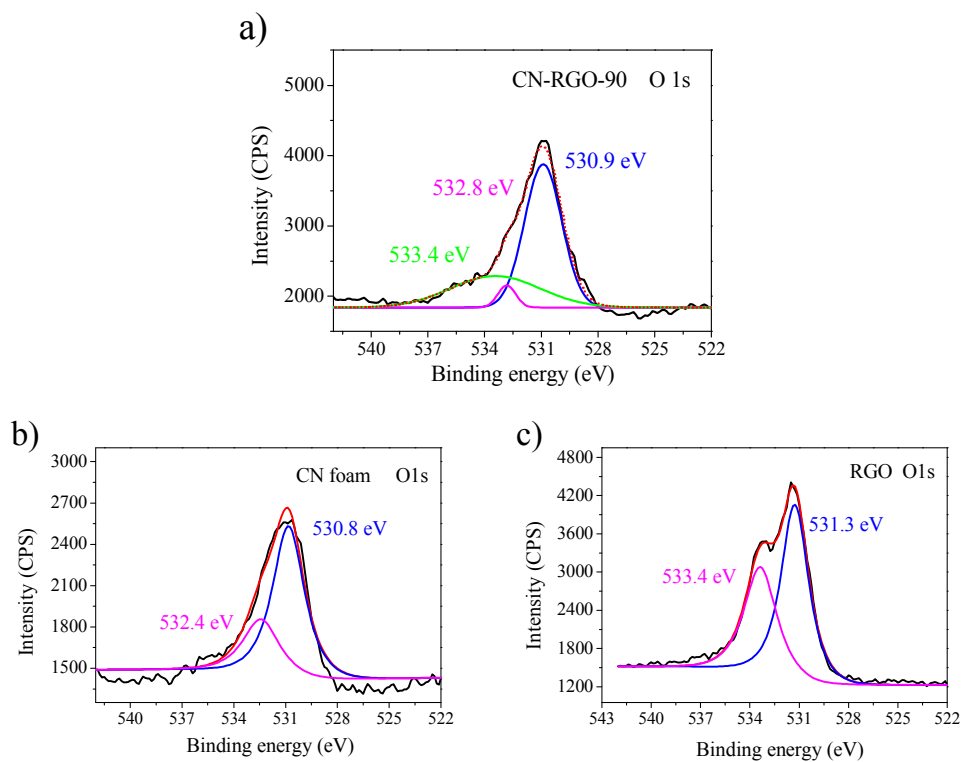

**Fig. SI-6** Detailed XPS spectra for O 1s: a) CN-RGO-90, b) pristine CN foam (300 °C), and c) pure RGO (300 °C).

**Table SI-1** Element analysis and XPS quantity analysis results for the prepared samples.

| <b>Samples</b>       | <b>Annealing temperature</b> | <b>Composition calculated from element analysis</b> | <b>Composition calculated from XPS results</b> |
|----------------------|------------------------------|-----------------------------------------------------|------------------------------------------------|
| <b>CN-RGO-6</b>      | 300 °C                       | CN <sub>1.01</sub> O <sub>0.14</sub>                |                                                |
| <b>CN-RGO-30</b>     | 300 °C                       | CN <sub>1.05</sub> O <sub>0.16</sub>                |                                                |
| <b>CN-RGO-60</b>     | 300 °C                       | CN <sub>0.79</sub> O <sub>0.22</sub>                |                                                |
| <b>CN-RGO-90</b>     | 300 °C                       | CN <sub>0.61</sub> O <sub>0.26</sub>                | CN <sub>0.356</sub> O <sub>0.236</sub>         |
| <b>CN-RGO-90/500</b> | 500 °C                       | CN <sub>0.34</sub> O <sub>0.015</sub>               |                                                |
| <b>CN-RGO-90/750</b> | 750 °C                       | CN <sub>0.12</sub> O <sub>0.006</sub>               |                                                |
| <b>CN foam</b>       | 300 °C                       | CN <sub>1.04</sub> O <sub>0.1</sub>                 |                                                |
| <b>CN foam</b>       | 500 °C                       | CN <sub>0.71</sub> O <sub>0.1</sub>                 |                                                |
| <b>CN foam</b>       | 750 °C                       | CN <sub>0.33</sub> O <sub>0.02</sub>                |                                                |
| <b>RGO</b>           | 300 °C                       | CO <sub>0.009</sub>                                 |                                                |
| <b>RGO</b>           | 500 °C                       | CO <sub>0.004</sub>                                 |                                                |
| <b>RGO</b>           | 750 °C                       | CO <sub>0.002</sub>                                 |                                                |
| <b>GO</b>            | /                            | CO <sub>0.92</sub>                                  |                                                |
